# Supplementary material for: Sheathless Microflow Cytometry Using Viscoelastic Fluids
Source: PubMed Central journal article supplement (PMC5617843; doi:10.1038/s41598-017-12558-2), 2017-09-27
Supplement: 41598_2017_12558_MOESM1_ESM.pdf [file 41598_2017_12558_MOESM1_ESM.pdf]

**SUPPLEMENTARY INFORMATION FOR**  
**SHEATHLESS MICROFLOW CYTOMETRY USING VISCOELASTIC FLUIDS**

Mohammad Asghari<sup>†</sup>, Murat Serhatlioglu<sup>†</sup>, Bülend Ortaç<sup>†</sup>, Mehmet E. Solmaz<sup>‡</sup>, and Caglar Elbuken<sup>†\*</sup>

<sup>†</sup> UNAM - National Nanotechnology Research Center, Institute of Materials Science and Nanotechnology, Bilkent University, 06800, Ankara, Turkey.

<sup>‡</sup> Department of Electrical and Electronics Engineering, Izmir Katip Celebi University, 35620, Izmir, Turkey

\* Corresponding author: Caglar Elbuken

Tel: +90-312-2903550; Fax: +90-312-2664365; E-mail: elbuken@unam.bilkent.edu.tr

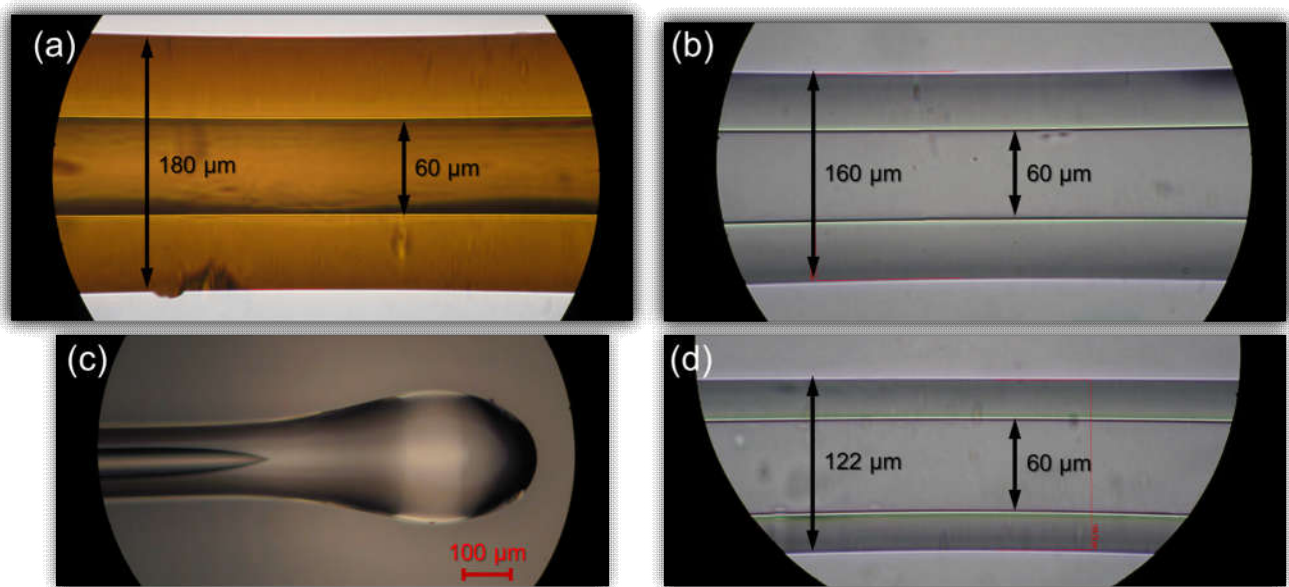

**Figure S1.** Preparation of capillary tube. (a) 160  $\mu\text{m}$  OD, 60  $\mu\text{m}$  ID capillary tube with 10  $\mu\text{m}$  polyimide coating. (b) Polyamide coating was removed in sulfuric acid. (c) Ball lens protection cap to isolate the inner channel. (d) Capillary tube after 20 minutes of HF etching.

Alignment of capillary tube and fibers is crucial for flow cytometry measurement. We used a glass capillary tube (Figure S1a) with 160  $\mu\text{m}$  outer diameter (OD) (after removing the  $\sim 10$   $\mu\text{m}$  polyimide coating) and optical fibers with  $125 \pm 2$   $\mu\text{m}$  of OD in flow cytometer setup. The diameter of capillary tube was reduced to 122  $\mu\text{m}$  in hydrofluoric acid solution (HF) to match the diameter of the optical fibers. First, 10  $\mu\text{m}$  polyimide coating of capillary tube was stripped out in 95% sulfuric acid solution at 90  $^{\circ}\text{C}$  for 2 min (Figure S1b). Then, both ends of the capillary tube were melted to form a ball lens shape in a fusion splicer (Fujikara, FSM-100P) to protect the inside of the capillary during HF etching (Figure S1c). 15 cm long capillary tube was placed in 40% HF solution for 20 min and OD was reduced to 122  $\mu\text{m}$ . Finally, ball lens ends of capillary tube were clipped. It is worth noting that capillary preparation step was required due to the unavailability of the desired capillary matching the OD of the available fibers.

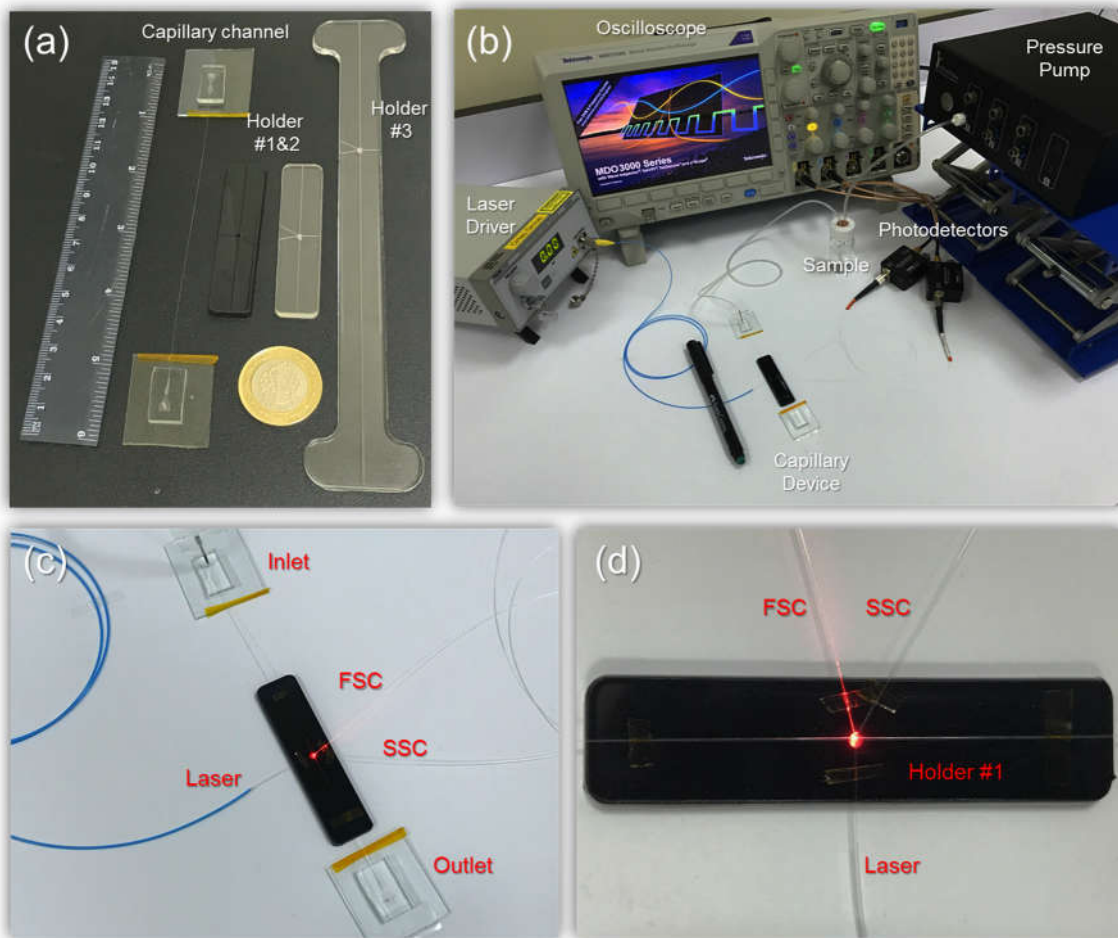

**Figure S2.** Viscoelastic microflow cytometry setup. (a) Capillary channel and PMMA holders (holder #1, #2 and #3) to assemble capillary tube and optical fibers. (b) Overview of experimental setup; capillary device, laser driver, oscilloscope, pressure pump, and photodetectors. (c) Closer look-up of viscoelastic microflow cytometer. (d) An image during the experiment (laser on) showing the optical interrogation region.

**Table S1.** Calculations of Re, Wi, and EI for PVP solution.

| P (mbar) | P (Pa) | Q (m <sup>3</sup> /s) | Q (μl/h) | Re       | Wi       | EI       |
|----------|--------|-----------------------|----------|----------|----------|----------|
| 50       | 5000   | 5.30144E-12           | 19.08518 | 0.039375 | 0.000566 | 0.014381 |
| 100      | 10000  | 1.06029E-11           | 38.17035 | 0.07875  | 0.001133 | 0.014381 |
| 200      | 20000  | 2.12058E-11           | 76.3407  | 0.1575   | 0.002265 | 0.014381 |
| 300      | 30000  | 3.18086E-11           | 114.5111 | 0.23625  | 0.003398 | 0.014381 |

**Table S2.** Calculations of Re, Wi, and EI for PEO solution.

| P (mbar) | P (Pa) | Q (m <sup>3</sup> /s) | Q (μl/h) | Re       | Wi       | EI       |
|----------|--------|-----------------------|----------|----------|----------|----------|
| 10       | 1000   | 1.13602E-12           | 4.08968  | 0.00904  | 0.152545 | 16.87407 |
| 50       | 5000   | 5.68011E-12           | 20.4484  | 0.045201 | 0.762723 | 16.87407 |
| 100      | 10000  | 1.13602E-11           | 40.8968  | 0.090402 | 1.525446 | 16.87407 |
| 200      | 20000  | 2.27204E-11           | 81.79361 | 0.180804 | 3.050893 | 16.87407 |
| 500      | 50000  | 5.68011E-11           | 204.484  | 0.452009 | 7.627232 | 16.87407 |

**Table S3.** Calculations of Re, Wi, and EI for HA solution.

| P (mbar) | P (Pa) | Q (m <sup>3</sup> /s) | Q (μl/h) | Re       | Wi       | EI       |
|----------|--------|-----------------------|----------|----------|----------|----------|
| 10       | 1000   | 3.53429E-13           | 1.272345 | 0.000875 | 0.025333 | 28.95238 |
| 50       | 5000   | 1.76715E-12           | 6.361725 | 0.004922 | 0.126667 | 25.73545 |
| 200      | 20000  | 7.06858E-12           | 25.4469  | 0.020455 | 0.506667 | 24.77037 |
| 500      | 50000  | 1.76715E-11           | 63.61725 | 0.053938 | 1.266667 | 23.48360 |
| 1000     | 100000 | 3.53429E-11           | 127.2345 | 0.109375 | 2.533333 | 23.16190 |
| 1500     | 150000 | 5.30144E-11           | 190.8518 | 0.166373 | 3.8      | 22.84021 |
| 1800     | 180000 | 6.36173E-11           | 229.0221 | 0.202500 | 4.56     | 22.51852 |

**Table S4.** Comparison of the published microflow cytometers

| Date                                                                                     | Authors            | Reference no. | CV (%) | Focusing Method         | Measurement mode * | Chip material ** | Particle type *** | Particle diam. (µm) |
|------------------------------------------------------------------------------------------|--------------------|---------------|--------|-------------------------|--------------------|------------------|-------------------|---------------------|
| Aug-17                                                                                   | Asghari et. al.    | this work     | 5.8    | viscoelastic            | FSC                | glass capillary  | PS beads          | 6                   |
| Jan-17                                                                                   | Wang et. al.       | 29            | 11.2   | inertial                | FL                 | glass capillary  | microbeads        | 10                  |
| Jan-17                                                                                   | Cheng et. al.      | 65            | 5.6    | hydrodynamic            | FL                 | PDMS             | PS beads          | 15                  |
| Jan-17                                                                                   | Cheng et. al.      | 65            | 19.8   | hydrodynamic            | SSC                | PDMS             | PS beads          | 15                  |
| Oct-16                                                                                   | Zhao et. al.       | 13            | 6.3    | hydrodynamic            | FSC                | PDMS             | PS beads          | 10                  |
| Oct-16                                                                                   | Zhao et. al.       | 13            | 17.9   | hydrodynamic            | FSC                | PDMS             | PS beads          | 6                   |
| Dec-14                                                                                   | Testa et. al.      | 66            | 8.3    | hydrodynamic            | FL                 | PMMA             | microbeads        | 10                  |
| Dec-14                                                                                   | Testa et. al.      | 66            | 15.4   | hydrodynamic            | FL                 | PMMA             | microbeads        | 23                  |
| Jun-14                                                                                   | Nawaz et. al.      | 70            | 3.8    | inertial & hydrodynamic | FSC                | PDMS             | PS beads          | 10                  |
| Jun-14                                                                                   | Nawaz et. al.      | 70            | 9.8    | inertial & hydrodynamic | SSC                | PDMS             | PS beads          | 10                  |
| Jan-14                                                                                   | Chen et. al.       | 24            | 19.4   | acoustic                | FL                 | PDMS             | PS beads          | 7.3                 |
| Jan-14                                                                                   | Chen et. al.       | 24            | 10.9   | acoustic                | FL                 | PDMS             | PS beads          | 10                  |
| May-13                                                                                   | Erickson et. al.   | 26            | 11.6   | hydrodynamic            | FSC                | fused silica     | PS beads          | 10                  |
| Jul-12                                                                                   | Watts et. al.      | 14            | 8      | hydrodynamic            | FL                 | PDMS             | PS beads          | 2.5                 |
| Jul-12                                                                                   | Watts et. al.      | 14            | 14     | hydrodynamic            | FL                 | PDMS             | PS beads          | 6                   |
| Apr-12                                                                                   | Mao et. al.        | 5             | 6.3    | inertial & hydrodynamic | FL                 | PDMS             | PS beads          | 15.5                |
| Apr-12                                                                                   | Mao et. al.        | 5             | 9.1    | inertial & hydrodynamic | FSC                | PDMS             | PS beads          | 7.3                 |
| May-11                                                                                   | Frankowski et. al. | 67            | 1.8    | hydrodynamic            | FL                 | PC               | PS beads          | 3                   |
| Jan-11                                                                                   | Kennedy et. al.    | 19            | 15     | hydrodynamic            | FL                 | PDMS             | PS beads          | 6                   |
| Jul-10                                                                                   | Rosenauer et. al.  | 17            | 8.4    | hydrodynamic            | TR                 | SU-8             | PS beads          | 12                  |
| Jul-10                                                                                   | Rosenauer et. al.  | 17            | 19.1   | hydrodynamic            | TR                 | SU-8             | PS beads          | 8                   |
| May-10                                                                                   | Oakey et. al.      | 73            | 5.6    | inertial                | FL                 | PDMS             | PS beads          | 10.2                |
| Nov-09                                                                                   | Bhagat et. al.     | 31            | 18     | inertial                | FL                 | PDMS             | PS beads          | 6                   |
| Mar-09                                                                                   | Mao et. al.        | 6             | 9.3    | inertial & hydrodynamic | FL                 | PDMS             | PS beads          | 8.3                 |
| Jan-09                                                                                   | Kummrow et. al.    | 18            | 4.9    | hydrodynamic            | FL                 | PMMA/PC          | PS beads          | 5                   |
| Nov-07                                                                                   | Goddard et. al.    | 72            | 2.5    | acoustic                | FL                 | glass capillary  | PS beads          | 10                  |
| Nov-07                                                                                   | Goddard et. al.    | 72            | 7.7    | acoustic                | SSC                | glass capillary  | PS beads          | 10                  |
| Aug-06                                                                                   | Simonnet et. al.   | 68            | 3.4    | hydrodynamic            | FL                 | PDMS             | PS beads          | 1.9                 |
| Jul-06                                                                                   | Bang et. al.       | 69            | 1.4    | hydrodynamic            | FL                 | PDMS             | PU beads          | 3                   |
| Jan-06                                                                                   | Goddard et. al.    | 71            | 24     | acoustic                | FL                 | glass capillary  | PS beads          | 10                  |
| * FSC = forward scatter    SSC = side scatter    FL = fluorescence    TR = transmittance |                    |               |        |                         |                    |                  |                   |                     |
| ** PDMS = polydimethyl siloxane    PMMA = polymethyl methacrylate    PC = polycarbonate  |                    |               |        |                         |                    |                  |                   |                     |
| *** PS = polystyrene    PU = polyurethane                                                |                    |               |        |                         |                    |                  |                   |                     |
